# Supplementary material for: PERPETUAL FLOWERING2 coordinates the vernalization response and perennial flowering in Arabis alpina
Source: PubMed Central journal article supplement (PMC6363098; doi:10.1093/jxb/ery423), 2018-11-27
Supplement: ery423_suppl_supplementary_table_s1-s3.pdf [file ery423_suppl_supplementary_table_s1-s3.pdf]

**Table S1.** Primers used for PIPE-cloning of the *PEP2* locus

|                                             |         |                                                                                         |
|---------------------------------------------|---------|-----------------------------------------------------------------------------------------|
| <i>PEP2</i> 4Kb promoter region cloning     | Forward | GGGGACAAGTTTGTACAAAAAAGCAGGCTTCGTCCAGATCCCGGACATGGC                                     |
|                                             | Reverse | TGTGGTGCATCATTTAGATCCCACATTTTTTTTTTTTTGGTTATAAAAAGTTTAA<br>AGAAAATTTCAATCT              |
| <i>PEP2</i> from ATG to the downstream gene | Forward | GGGGACAAGTTTGTACAAAAAAGCAGGCTTCATGTGGGATCTAAATGATGC<br>ACCACA                           |
|                                             | Reverse | GGGGACCACTTTGTACAAGAAAGCTGGGTCCTAGCATTACTATGATTTTATA<br>TATATAGAGGAGATCTTGCGG           |
| PIPE for <i>pPEP2::PEP2</i>                 | Forward | AGATTGAAATTTTCTTAAAACCTTTTTATAACCAAAAAAAAAAAAAATGTGGGATC<br>TAAATGATGCACCACA            |
|                                             | Reverse | GAAGCCTGCTTTTTTGTACAAACTTGGC                                                            |
| C-terminal VENUS-9Ala cloning               | Forward | TCCAACCTCCTCATGAGACCTTCTATGGCTGCGGCTGCTGC                                               |
|                                             | Reverse | CTTTTTCAGAATTTGTCACCTTATATATATATAAAAAGGGATTTAGAATAATAA<br>AGATTTACTTGTACAGCTCGTCCATGCCG |
| PIPE for <i>pPEP2::PEP2::VENUS-9Ala</i>     | Forward | GCAGCAGCCGCAGCCATAGAAGGTCTCATGAGAGGAGGTTGGA                                             |
|                                             | Reverse | CGGCATGGACGAGCTGTACAAGTAAATCTTTATTATTCTAAATCCCTTTTTAT<br>ATATATATAAGTGACAAATTCTGAAAAAG  |
| N-terminal VENUS-9Ala cloning               | Forward | GATAGATTGAAATTTTCTTAAAACCTTTTTATAACCAAAAAAAAAAAAAATGGTGA<br>GCAAGGGCGAGG                |
|                                             | Reverse | CGCTGCCGCAGCGGCAGCAGCCGCAGCGCCCTTGTACAGCTCGTCCATGCC<br>G                                |
| PIPE for <i>pPEP2::VENUS-9Ala::PEP2</i>     | Forward | TGCCGCTGCGGCAGCGATGTGGGATCTAAATGATGCACCACA                                              |
|                                             | Reverse | CCTCGCCCTTGCTCACCATTTTTTTTTTTTTGGTTATAAAAAGTTTAAAGAAAAT<br>TTCAATCTATC                  |

**Table S2** Statistical differences in Figure S2 determined by multiple pairwise comparisons using Benjamini-Hochberg-corrected p-values comparing *FLC* mRNA levels between *FRI* and *FRI ap2-7* at different developmental stages. The comparisons highlighted in yellow are significantly different ( $\alpha$ -value of 0.05).

|          | ap2 0   | ap2 10   | ap2 20  | ap2 30  | ap2 40  | ap2 10AV | ap2 20AV | FRI 0   | FRI 10   | FRI 20  | FRI 30  | FRI 40  | FRI 10AV |
|----------|---------|----------|---------|---------|---------|----------|----------|---------|----------|---------|---------|---------|----------|
| ap2 10   | 0.00388 | -        | -       | -       | -       | -        | -        | -       | -        | -       | -       | -       | -        |
| ap2 20   | 0.90625 | 0.0046   | -       | -       | -       | -        | -        | -       | -        | -       | -       | -       | -        |
| ap2 30   | 0.10564 | 0.00024  | 0.08783 | -       | -       | -        | -        | -       | -        | -       | -       | -       | -        |
| ap2 40   | 0.01998 | 0.000067 | 0.01696 | 0.39686 | -       | -        | -        | -       | -        | -       | -       | -       | -        |
| ap2 10AV | 0.0019  | 0.000018 | 0.00167 | 0.04615 | 0.21223 | -        | -        | -       | -        | -       | -       | -       | -        |
| ap2 20AV | 0.001   | 0.000018 | 0.0009  | 0.02032 | 0.10624 | 0.68568  | -        | -       | -        | -       | -       | -       | -        |
| FRI 0    | 0.67245 | 0.0019   | 0.60086 | 0.21316 | 0.04624 | 0.00391  | 0.0019   | -       | -        | -       | -       | -       | -        |
| FRI 10   | 0.07517 | 0.13771  | 0.08896 | 0.00285 | 0.00077 | 0.000087 | 0.000067 | 0.03201 | -        | -       | -       | -       | -        |
| FRI 20   | 0.26256 | 0.00066  | 0.22518 | 0.58313 | 0.16414 | 0.01552  | 0.00676  | 0.50678 | 0.00831  | -       | -       | -       | -        |
| FRI 30   | 0.02578 | 0.000076 | 0.0208  | 0.48316 | 0.88647 | 0.17151  | 0.08564  | 0.06083 | 0.00091  | 0.20651 | -       | -       | -        |
| FRI 40   | 0.00824 | 0.000046 | 0.00676 | 0.19981 | 0.65729 | 0.42811  | 0.22518  | 0.01969 | 0.00034  | 0.07402 | 0.57001 | -       | -        |
| FRI 10AV | 0.0023  | 0.000018 | 0.0019  | 0.06002 | 0.25823 | 0.88647  | 0.60086  | 0.00501 | 0.0001   | 0.01969 | 0.21223 | 0.50792 | -        |
| FRI 20AV | 0.00123 | 0.000018 | 0.00103 | 0.02634 | 0.13771 | 0.79724  | 0.88647  | 0.00239 | 0.000067 | 0.00863 | 0.10624 | 0.28038 | 0.68568  |
